WINTER 2021 | VOLUME 19 | NUMBER 1

# Focus

The Journal of Lifelong Learning in Psychiatry

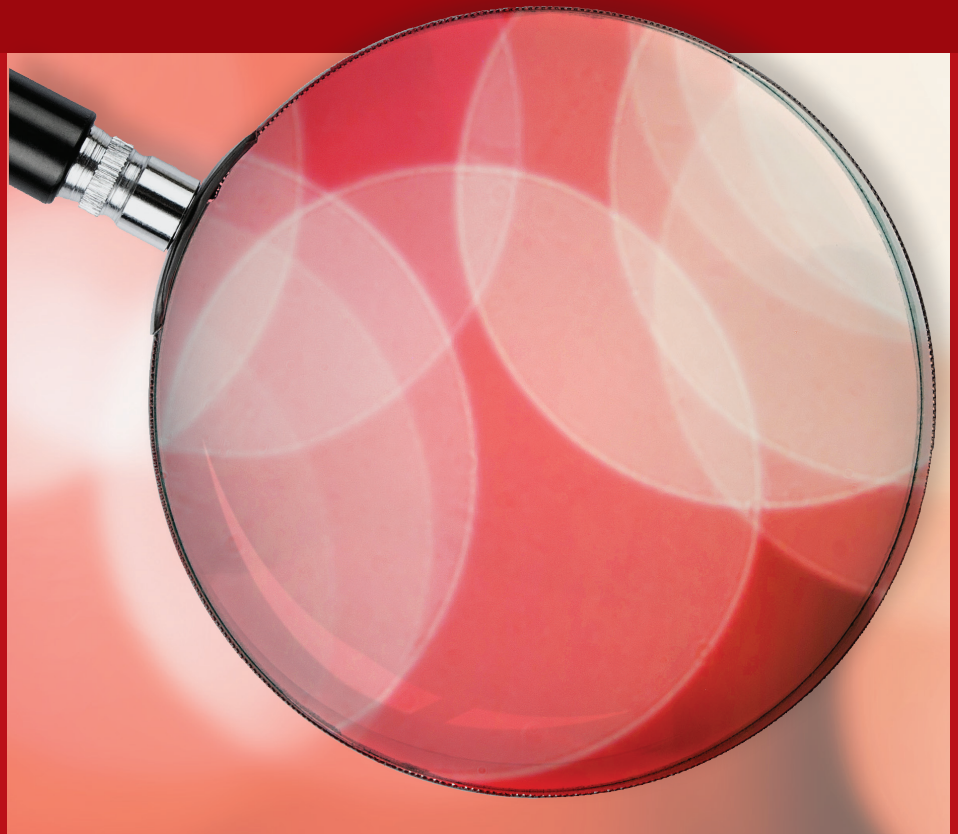

## Perspectives in Psychopharmacology

Guest Editor: Boadie W. Dunlop, M.D., MSCR

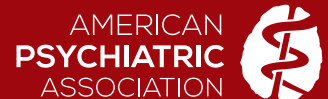

[focus.psychiatryonline.org](http://focus.psychiatryonline.org)
