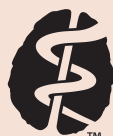

#### APA Publishing

##### *Publisher*

John McDuffie  
*Editorial Director, Journals*  
Michael D. Roy  
*Managing Editor, Journals*  
Demarie S. Jackson  
*Production Manager, Journals*  
Wendy Lieberman Taylor

#### APA Department of Continuing Medical Education

*Associate Director, Focus*  
Kristen Moeller  
*Editorial Manager, CME and MOC*  
Ann Thomas

*Focus* (ISSN 1541-4094) is published quarterly by the American Psychiatric Association, 800 Maine Ave. S.W., Suite 900, Washington, D.C. 20024. Printed in U.S.A. Periodicals postage paid at Washington, D.C., and additional mailing offices. POSTMASTER: Send all address changes to *Focus*, Circulation Department, American Psychiatric Association Publishing, 800 Maine Ave. S.W., Suite 900, Washington, D.C. 20024.

#### Subscriptions

U.S. APA member \$441, U.S. non-member \$690. For additional subscription options, including international and student rates, contact Customer Service at (202) 559-3900 or (800) 368-5777.

#### Officers of the Association

Jeffrey Geller, M.D., M.P.H., *President*  
Vivian Pender, M.D., *President-Elect*  
Saul Levin, M.D., M.P.A., *CEO and Medical Director*

#### Editorial Offices

Telephone: (202) 559-3897  
Journal Web site: [focus.psychiatryonline.org](http://focus.psychiatryonline.org)  
*Focus* CME: [education.psychiatry.org/diweb/mylearning](http://education.psychiatry.org/diweb/mylearning)

#### Change of Address and Assistance With Subscriptions

Contact Customer Service at (202) 559-3900 or (800) 368-5777 or e-mail [appi@psych.org](mailto:appi@psych.org).

#### CME

Email: [educme@psych.org](mailto:educme@psych.org)

#### Online Access

Call (800) 368-5777 or e-mail [appi@psych.org](mailto:appi@psych.org) for assistance with online access to *Focus* and CME activities.

#### APA Learning Center

[education.psychiatry.org](http://education.psychiatry.org)

Copyright © 2021, American Psychiatric Association

# Focus

The Journal of Lifelong Learning in Psychiatry

#### Editor

Mark Hyman Rapaport, M.D.  
*Salt Lake City, Utah*

#### Applied Armamentarium

Boadie Dunlop, M.D.  
*Atlanta, Georgia*

#### Communication Commentary

Dorothy E. Stubbe, M.D.  
*New Haven, Connecticut*

#### Ethics Commentary

Laura B. Dunn, M.D.  
*Palo Alto, California*  
Jarrod A. Marks, M.D.  
*Syracuse, New York*

#### Patient Management Exercise

Ian A. Cook, M.D.  
*Los Angeles, California*

#### Safety Commentary

Yad M. Jabbarpour, M.D.  
*Catawba, Virginia*

#### Senior Advisory Board

Carol A. Bernstein, M.D.  
*New York, New York*  
Kathleen T. Brady, M.D., Ph.D.  
*Charleston, South Carolina*  
Peter F. Buckley, M.D.  
*Richmond, Virginia*  
Glen O. Gabbard, M.D.  
*Houston, Texas*  
Ira M. Lesser, M.D.  
*Torrance, California*  
Charles F. Reynolds III, M.D.  
*Pittsburgh, Pennsylvania*  
Pedro Ruiz, M.D.  
*Houston, Texas*  
Daniel K. Winstead, M.D.  
*New Orleans, Louisiana*  
Joel Yager, M.D.  
*Denver, Colorado*

#### Editorial Board

Richard Balon, M.D.  
*Rochester Hills, Michigan*  
Joseph A. Cheong, M.D.  
*Nashville, Tennessee*  
Raymond Lam, M.D., F.R.C.P.C.  
*Vancouver, Canada*

Sherrell T. Lam, MD, F.A.C.P.

*Bethesda, Maryland*  
Avram H. Mack, M.D.

*Philadelphia, Pennsylvania*  
Vishal Madaan, M.D., M.B.B.S.

*Charlottesville, Virginia*  
David Mischoulon, M.D., Ph.D.

*Boston, Massachusetts*  
Francisco A. Moreno, M.D.

*Tucson, Arizona*  
Philip R. Muskin, M.D.

*New York, New York*  
Michele T. Pato, M.D., M.P.H.

*Brooklyn, New York*  
Jeffrey Rakofsky, M.D.

*Atlanta, Georgia*  
Victor I. Reus, M.D.

*San Francisco, California*  
James W. Thompson, M.D., M.P.H.

*Palm Beach, Florida*  
Marcia L. Verduin, M.D.

*Orlando, Florida*  
Sidney Zisook, M.D.

*San Diego, California*

#### Associate Editors eFOCUS

David L. Fogelson, M.D.  
*Los Angeles, California*  
Robert J. Boland, M.D.  
*Boston, Massachusetts*

#### Focus Self-Assessment

##### Editorial Board

Rashi Aggarwal, M.D.  
*Newark, New Jersey*  
Nicole Cotton, M.D.  
*Atlanta, Georgia*  
Vikas Gupta, M.D., M.P.H.  
*Greenville, North Carolina*  
Venkata Kolli, M.B.B.S.  
*Columbus, Nebraska*  
Vishal Madaan, M.D.  
*Charlottesville, Virginia*  
Lindsay J. Moskowitz, M.D.  
*Greenwich, Connecticut*  
Jose Vito, M.D.  
*New York, New York*

#### Editor Emerita

Deborah J. Hales, M.D.  
*Washington, D.C.*
