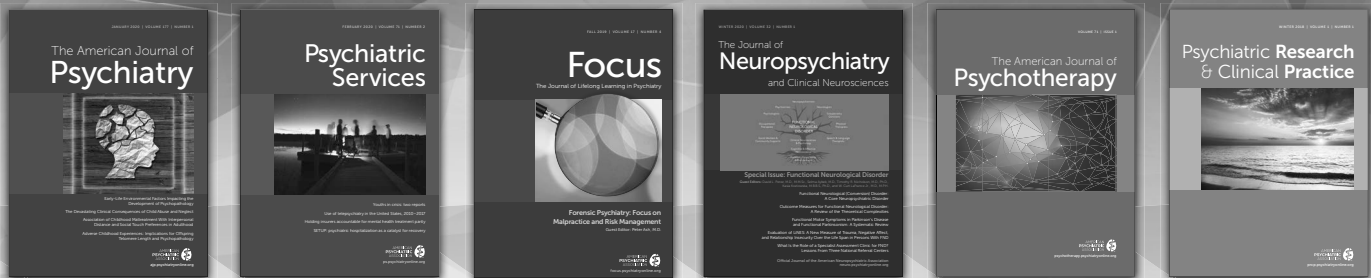

## More Ways to Engage Beyond Reading a Page

The journals of American Psychiatric Association Publishing are leading contributors to the literature. Our articles advance understanding of all aspects of mental and behavioral disorders and their treatment. With close to 10 million page views of journal content annually, APA Publishing's journals reach audiences at more than 2,000 U.S. and international institutions, a figure that includes nearly 100% of U.S. medical schools and hospitals.

APA Publishing is committed to discovery of journal articles and offers several ways to access journal content on the **PsychiatryOnline** knowledge portal, ensuring that practitioners can keep up with the latest findings in the manner they prefer.

### PODCASTS

Each episode brings you an in-depth look at articles featured in that month's issue. Lively discussion and wide-ranging interviews with authors cover the background, rationale, main findings, and future implications of the research.

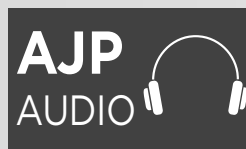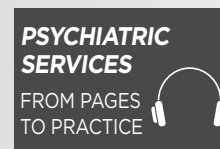

### AUDIO SYNOPSES

Prepared in collaboration with *Psychiatric News*, these audio synopses accompany the online article and can be accessed as a skill through Amazon's Alexa app.

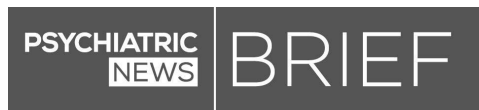

### CURATED COLLECTIONS

These collections of recent and seminal research in a given area can be used as a launch point for authors conducting literature reviews and for educators working on course content. Curated **Editor's Choice** collections from *Psychiatric Services* are currently available.

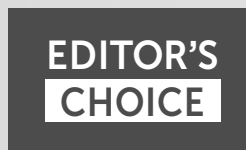

### ALERTS

Keep up with all of the latest research being published by signing up to receive **Publication Alerts** and following on Twitter @APAPubJournals.

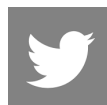

### GET INVOLVED!

We also encourage active contributions to our journals. Submit your research for publication consideration at one of our peer-reviewed titles. Even if you don't have a paper at present, visit our submission site and set up your reviewer account so that you have a say in future contributions to the literature.

[psychiatryonline.org/journals](http://psychiatryonline.org/journals)

Subscribe @ [www.appi.org](http://www.appi.org) • Email: [appi@psych.org](mailto:appi@psych.org) • Toll Free: 1-800-368-5777

AMERICAN  
PSYCHIATRIC  
ASSOCIATION  
PUBLISHING 

# PSYCHIATRYonline

Your Destination for Lifelong Learning in Psychiatry

The one-stop resource for information on diagnosis, treatment, guidelines, the latest research, and breaking news from the field.

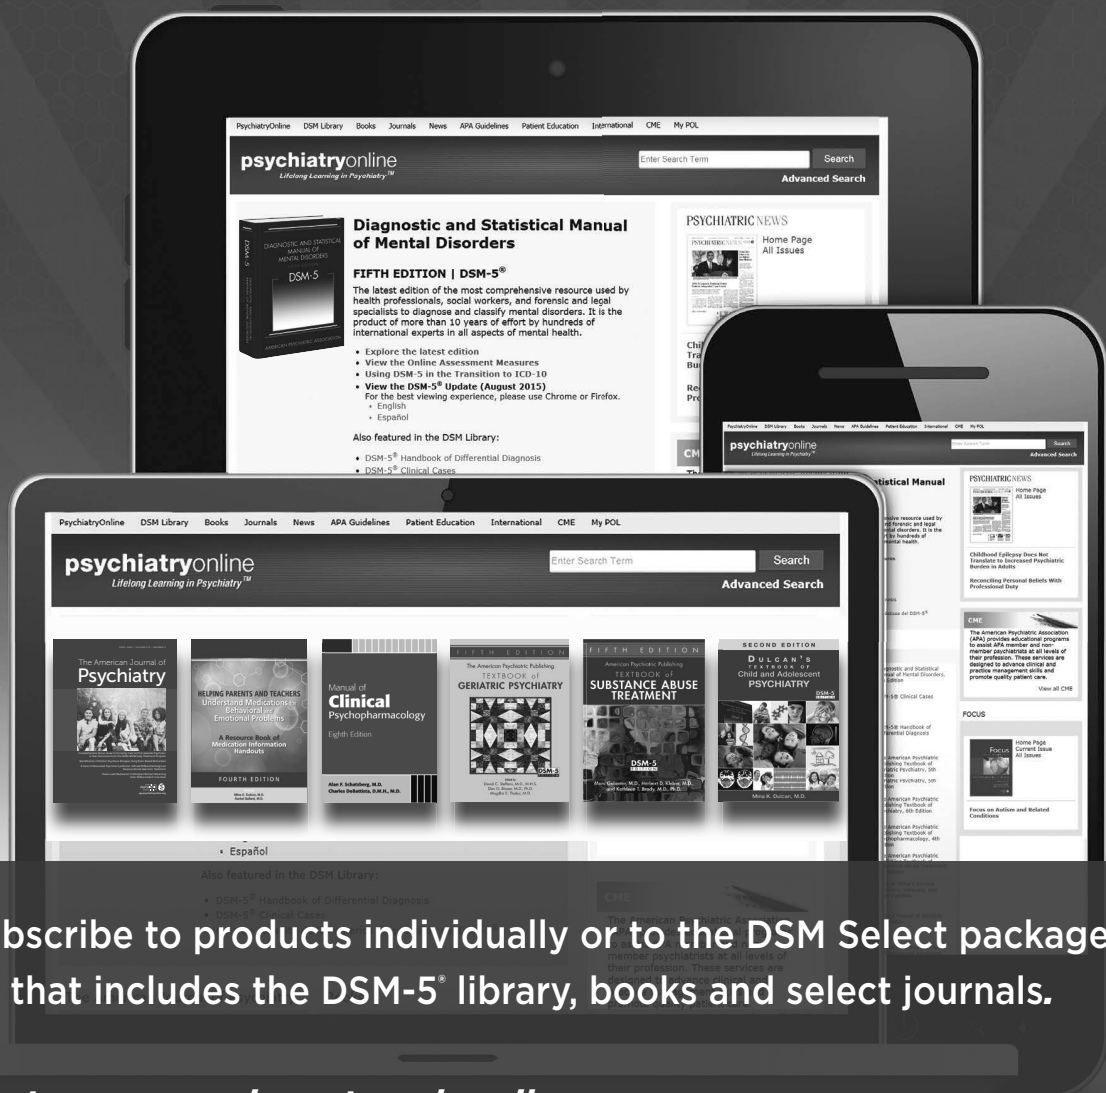

Subscribe to products individually or to the DSM Select package that includes the DSM-5<sup>®</sup> library, books and select journals.

**Go to [www.appi.org](http://www.appi.org) to subscribe.**

*Institutional subscription options are available. For more information contact: [institutions@psych.org](mailto:institutions@psych.org); 800-368-5777 ext. 3720*

AMERICAN  
PSYCHIATRIC  
ASSOCIATION  
PUBLISHING  
[www.appi.org](http://www.appi.org)

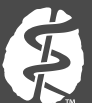

# Focus

The Journal of Lifelong Learning in Psychiatry

## The Best Resource for

- Clinical Synthesis
- Expert Guidance
- Lifelong Learning
- Maintenance of Certification

**Focus**, APA's quarterly clinical review journal, is designed for practicing psychiatrists to keep abreast of significant clinical knowledge and advances in the field through self-directed lifelong learning. Four issues each year provide comprehensive reviews of major clinical areas of psychiatry. **Focus** also provides an organized learning and self-assessment program with 44 hours of CME each year.

## An Annual Subscription to Focus Gives You:

- Reviews of core areas in psychiatry, with each issue overseen by a Guest Editor clinical expert in that area.
- Articles on best practices, new developments and the current state of practice.
- Quizzes that allow you to earn up to five *AMA PRA Category 1 Credits*<sup>™</sup> by completing CME questions for each issue—for a total of up to 20 CME credits per year.
- An annual 120-question **self-assessment exam** for an additional 24 CME credits and APBN MOC self-assessment credits that provides you with a comparison of your result against the group score of your peers.
- Online access to back issues (CME credits for issue quizzes available only for your subscription year).

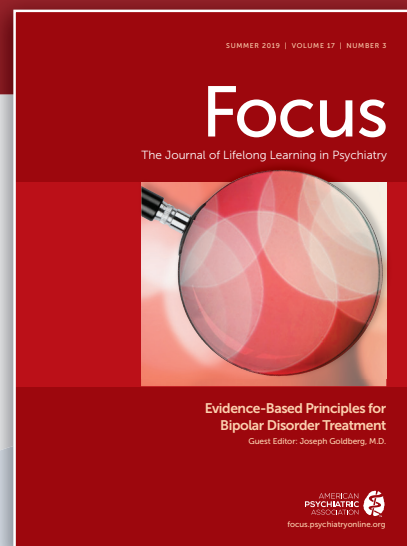

[focus.psychiatryonline.org](http://focus.psychiatryonline.org)

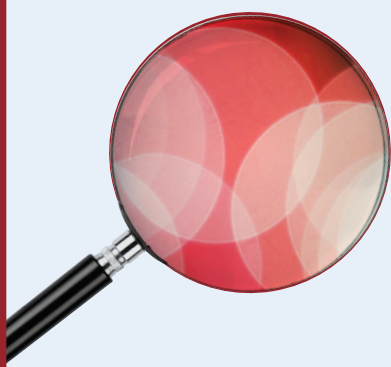

AMERICAN  
PSYCHIATRIC  
ASSOCIATION  
PUBLISHING

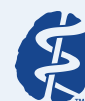

[www.appi.org](http://www.appi.org)  
1-800-368-5777  
[appi@psych.org](mailto:appi@psych.org)

Priority Code AH1929A
